# Supplementary material for: Evaluating Potentially Toxic Elements Under Prolonged Application of Pig Manure in Brazilian Soils
Source: Research Square preprint supplement (doi:10.21203/rs.3.rs-6019209/v1), 2025-03-26
Supplement: Supplementary file 1 [file c2f4f3f902f6f678acf29863.docx]

**Table 8: Effect of Location, site, and depth on Potentially Toxic Elements Under Prolonged Application of Pig Manure in Brazilian Soils**

| Cu Cd Zn Mn Pb Fe  Location Site Depth .............................................................................(mg/kg)......................................................................................... | | | | | | | | |
| --- | --- | --- | --- | --- | --- | --- | --- | --- |
| FL | NPM | **0-10** | 0.045e | 0.007cde | 0.570ef | 12.350bc | 0.264a-i | 35.555ab |
|  |  | **10-20** | 0.049e | 0.007cde | 0.285ef | 7.165b-f | 0.312a-d | 32.849abc |
|  |  | **20-30** | 0.050e | 0.005de | 0.233ef | 6.666b-f | 0.293a-f | 33.744abc |
|  |  | **30-50** | 0.043e | 0.005de | 0.146ef | 5.925b-f | 0.292a-f | 32.074a-d |
|  |  | **50-70** | 0.032e | 0.004e | 0.073ef | 2.445def | 0.318abc | 12.188b-e |
|  |  | **70-100** | 0.026e | 0.004e | 0.063ef | 1.211f | 0.410a | 7.530cde |
|  | PMS | **0-10** | 0.579cde | 0.004e | 7.530de | 31.101a | 0.040jk | 22.823a-e |
|  |  | **10-20** | 0.566cde | 0.006de | 2.870ef | 13.721b | 0.018k | 32.737abc |
|  |  | **20-30** | 0.194de | 0.005de | 1.058ef | 10.745b-e | 0.023k | 29.348a-e |
|  |  | **30-50** | 0.093e | 0.003e | 0.254ef | 6.337b-f | 0.050ijk | 22.071a-e |
|  |  | **50-70** | 0.084e | 0.004e | 0.010ef | 3.185cdef | 0.146b-k | 12.303b-e |
|  |  | **70-100** | 0.070e | 0.003e | 0.099ef | 1.697def | 0.178b-k | 10.788b-e |
| PDM | NPM | **0-10** | 0.044e | 0.003e | 0.345ef | 12.179bc | 0.091e-k | 30.440a-d |
|  |  | **10-20** | 0.056e | 0.004e | 0.189ef | 7.688b-f | 0.116c-k | 25.903a-e |
|  |  | **20-30** | 0.050e | 0.004e | 0.101ef | 5.320b-f | 0.076f-k | 34.170abc |
|  |  | **30-50** | 0.48e | 0.005de | 0.065ef | 3.481c-f | 0.084e-k | 31.947a-d |
|  |  | **50-70** | 0.030e | 0.003e | o.027f | 2.267def | 0.085e-k | 15.870b-e |
|  |  | **70-100** | 0.025e | 0.003e | 0.036f | 1.124f | 0.098d-k | 11.221b-e |
|  | PMS | **0-10** | 1.243ab | 0.028a | 26.133a | 4.702b-f | 0.265a-i | 27.605a-e |
|  |  | **10-20** | 1.228ab | 0.017abc | 23.834a | 8.084b-f | 0.093e-k | 23.121a-e |
|  |  | **20-30** | 0.831bc | 0.016bcd | 15.741bc | 3.143c-f | 0.126b-k | 24.123a-e |
|  |  | **30-50** | 0.312cde | 0.021ab | 2.455ef | 2.777def | 0.227a-k | 22.974a-e |
|  |  | **50-70** | 0.084e | 0.010b-e | 0.784ef | 0.534f | 0.257a-i | 21.339a-e |
|  |  | **70-100** | 0.218de | 0.008cde | 1.035ef | 0.128f | 0.259a-i | 16.512b-e |
| SJV | NPM | **0-10** | 0.047e | 0.008cde | 0.188ef | 2.474def | 0.281a-g | 26.158a-e |
|  |  | **10-20** | 0.035e | 0.012b-e | 0.081ef | 1.967def | 0.341ab | 29.003a-e |
|  |  | **20-30** | 0.026e | 0.012b-e | 0.045f | 1.642ef | 0.300a-e | 24.265a-e |
|  |  | **30-50** | 0.022e | 0.008cde | 0.031f | 1.405ef | 0.290a-f | 7.037cde |
|  |  | **50-70** | 0.016e | 0.009cde | 0.030f | 1.356f | 0.268a-h | 5.006de |
|  |  | **70-100** | 0.015e | 0.007cde | 0.015f | 0.724f | 0.247a-j | 2.055e |
|  | PMS | **0-10** | 1.499a | 0.013b-e | 19.458ab | 11.032bcd | 0.039jk | 21.686a-e |
|  |  | **10-20** | 0.705bcd | 0.008cde | 11.939cd | 3.598c-f | 0.052h-k | 32.023a-d |
|  |  | **20-30** | 0.241cde | 0.006cde | 1.762ef | 1.651def | 0.066g-k | 44.620a |
|  |  | **30-50** | 0.217de | 0.005de | 0.687ef | 0.916f | 0.078f-k | 36.526ab |
|  |  | **50-70** | 0.245cde | 0.007cde | 0.619ef | 0.841f | 0.083e-k | 38.057ab |
|  |  | **70-100** | 0.167de | 0.007cde | 0.410ef | 0.992f | 0.092e-k | 26.766a-e |

Means with the same letter (superscript) in the column for the same parameter are statistically not different, as determined by Tukey's test at a level of P ≤ 0.05.

| **Cu Cd Zn Mn Pb Fe**  **Factors .............................................................(mg/kg)...........................................** | | | | | | | | | | | | |
| --- | --- | --- | --- | --- | --- | --- | --- | --- | --- | --- | --- | --- |
| **Site**  NPM | 0.037b  0.006b  0.140b  4.299b  0.231a 25.857a  0.476a 0.009a  6.487a  5.844a  0.116b  22.056b | | | | | | | | | | | |
| PMS |
| **Location** |  |  | |  | | |  |  | |  | | |
| FL | 0.153b 0.005b  1.107c  8.546a  0.195a 23.667a  0.347a  0.010a  5.896a  4.285b 0.148b 23.769a  0.270a  0.009a  2.939b  2.383c  0.178ab 24.433a | | | | | | | | | | |
| PDB |
| SJV |
| **Soil depth (cm)** |  | |  | |  |  | | |  | |  |
| 0-10 | 0.576a | | 0.010a | | 9.037a | 12.306a | | | 0.163ab | | 27.378a |
| 10-20 | 0.440a | | 0.009ab | | 6.533b | 7.037b | | | 0.155ab | | 29.272a |
| 20-30 | 0.233b | 0.008a-c | | 3.157c | | | 4.862bc | 0.147b | | 31.712a | | |
| 30-50 | 0.123b | 0.008a-c | | 0.607d | | | 3.474cd | 0.170ab | | 25.438ab | | |
| 50-70 | 0.087b | 0.006bc | | 0.272d | | | 1.771d | 0.193ab | | 17.461bc | | |
| 70-100 | 0.082b | 0.005c | | 0.276d | | | 0.979d | 0.214a | | 12.479c | | |
| **Interaction**  Site (S ) * * * * * *  Location (Loc.) * ** ** * * * NS  Depth (D) * * * * * *  S x Loc. *** ** * ** * *  S x D * * * * * *  Loc. x D ** * * ** * **  S x Loc.x D * *** ** * * *  Stand Dev. 0.494 0.008 7.915 7.587 0.158 17.537  CV 192.63 101.380 238.830 149.600 91.180 73.200  R 2 (%) 59.32 46.76 75.77 58.36 48.90 33.89 | | | | | | | | | | | | |

**Table 9: Summary of interaction effect of location, land-use, and depth on potentially toxic elements under prolonged application of pig manure in Brazilian soils**

Means with the same letter (superscript) in the column for the same parameter are statistically not different, as determined by Tukey's test at a level of P ≤ 0.05. NS represents not significant; ∗ p ˂ 0.05; ∗∗ p ˂ 0.01 and ∗∗∗ p ˂ 0.001 level.
